# Supplementary material for: Prevalence of Germline Mutations in Genes Engaged in DNA Damage Repair by Homologous Recombination in Patients with Triple-Negative and Hereditary Non-Triple-Negative Breast Cancers
Source: PLoS One. 2015 Jun 17;10(6):e0130393. doi: 10.1371/journal.pone.0130393 (PMC4471155; doi:10.1371/journal.pone.0130393)
Supplement: S1 Text — (PDF) [file pone.0130393.s002.pdf]

### Triple-negative:

[illegible]

**Hereditary non-triple-negative:**

[illegible]
